# Supplementary material for: Recurrent supramolecular scenarios within complex 3-D hydrogen bond networks derived from organic ammonium salts of (4-amino-1-hydroxybutylidine)-1,1-bisphosphonic acid
Source: Royal Society of Chemistry journal article supplement (doi:10.1039/c7ce01034f), 2017-01-01
Supplement: c7ce01034f1.pdf [file c7ce01034f1.pdf]

## Recurrent supramolecular scenarios within complex 3-D hydrogen bond networks derived from organic ammonium salts of (4-amino-1-hydroxybutylidene)-1,1-bisphosphonic acid.

G. B. Deacon,<sup>a</sup> C. M. Forsyth,<sup>a</sup> N. B. Greenhill<sup>a</sup> and P. C. Junk.<sup>b</sup>

<sup>a</sup> School of Chemistry, Monash University, Clayton, Australia

<sup>b</sup> College of Science and Engineering, James Cook University, Townsville, Australia

Email: [glen.deacon@monash.edu](mailto:glen.deacon@monash.edu)

### Supplementary Information

#### S1. Powder X-ray Diffraction Data.

[enH<sub>2</sub>][LH<sub>3</sub>].2(H<sub>2</sub>O) (Coupled TwoTheta/Theta)

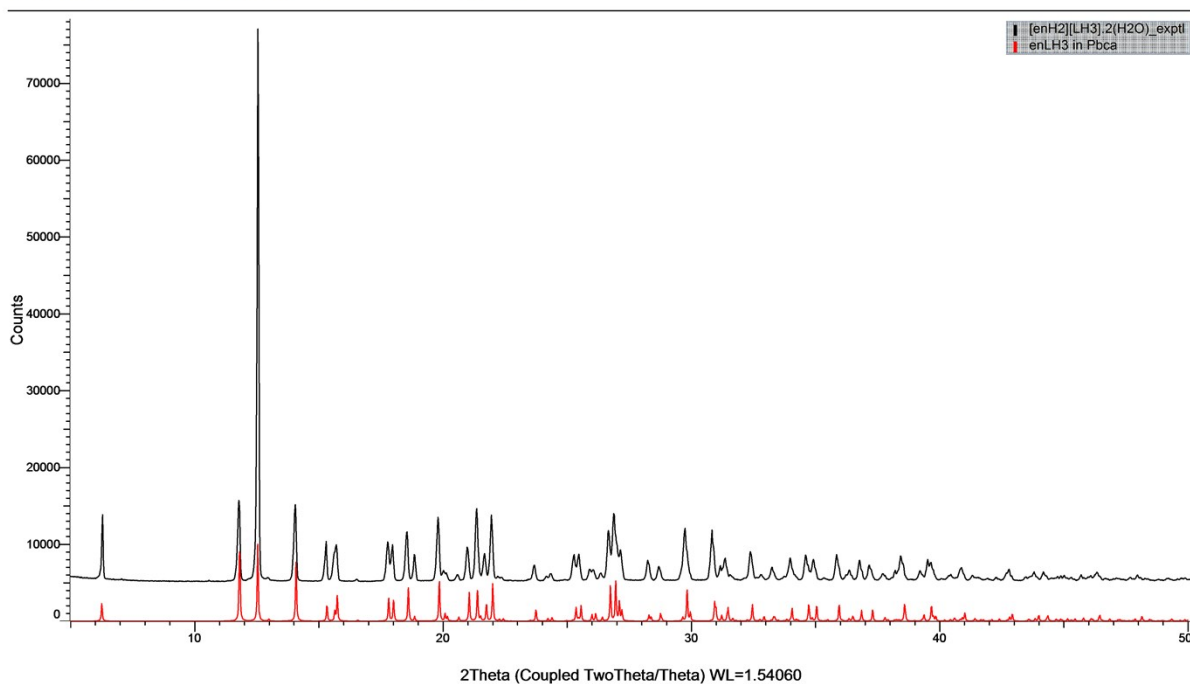

Figure S1.1. Experimental (black) and calculated (red) PXRD patterns for [enH<sub>2</sub>][LH<sub>3</sub>].2(H<sub>2</sub>O) **1**.

MeenLH3\_recrist (Coupled TwoTheta/Theta)

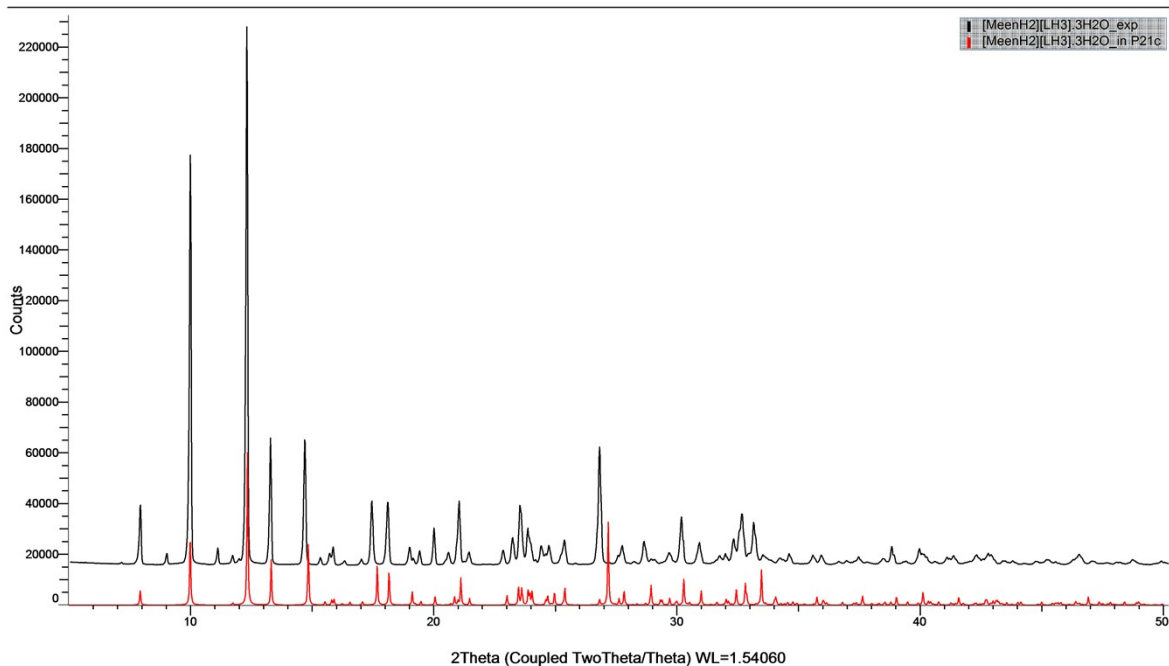

Figure S1.2. Experimental (black) and calculated (red) PXR D pattern for [MeenH<sub>2</sub>].[LH<sub>3</sub>].3(H<sub>2</sub>O) **2**.

[N,N'-Me2enH2].[LH3] (Coupled TwoTheta/Theta)

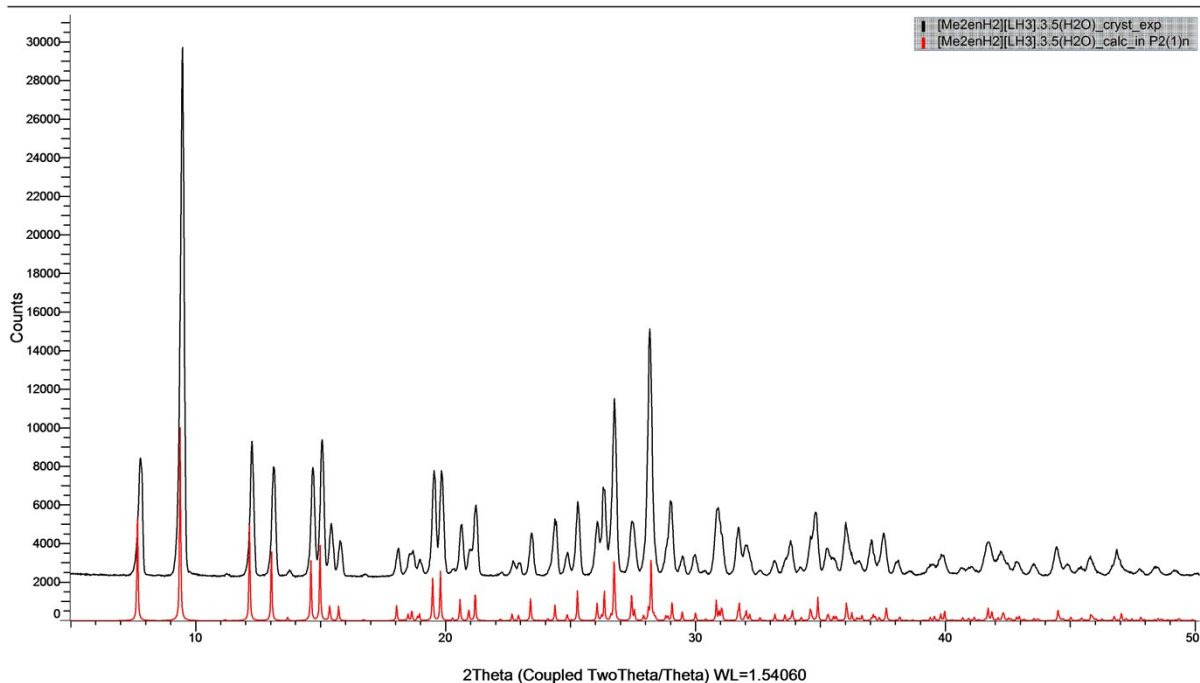

Figure S1.3. Experimental (black) and calculated (red) PXR D pattern for [Me<sub>2</sub>enH<sub>2</sub>].[LH<sub>3</sub>].3.5(H<sub>2</sub>O) **3**.

[Et<sub>2</sub>enH<sub>2</sub>][LH<sub>3</sub>].2(H<sub>2</sub>O)\_crude (Coupled TwoTheta/Theta)

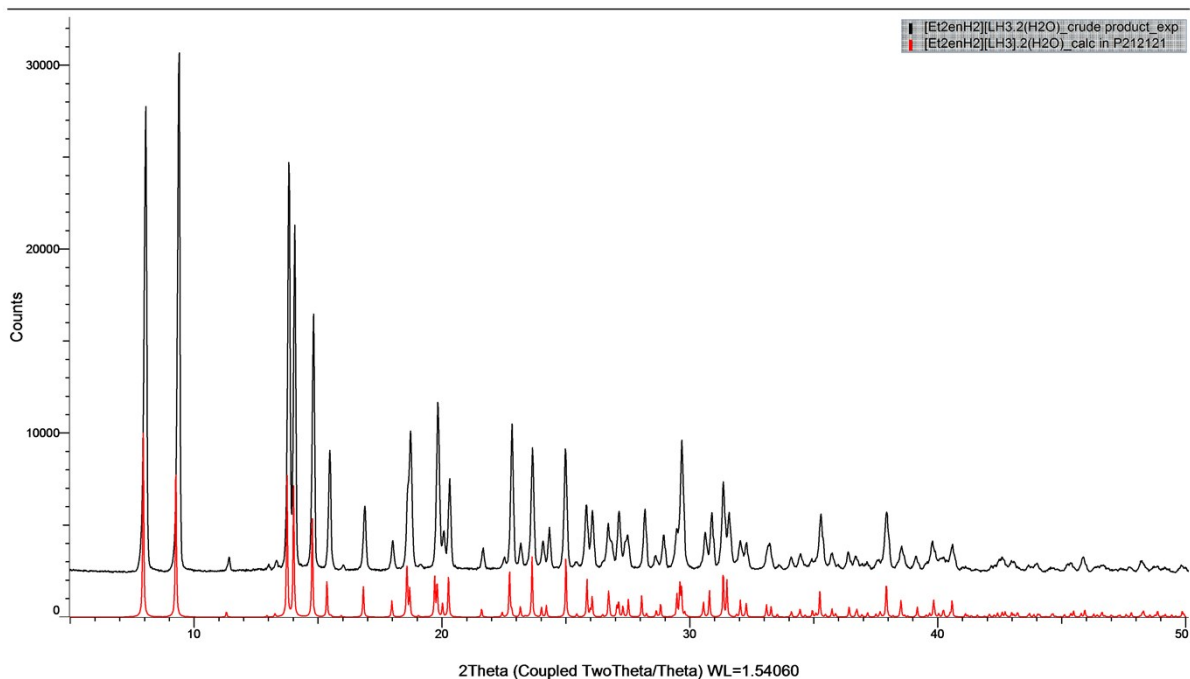

Figure S1.4. Experimental (black) and calculated (red) PXR D patterns for [Et<sub>2</sub>enH<sub>2</sub>][LH<sub>3</sub>].2(H<sub>2</sub>O) **4**.

[cy(NH<sub>3</sub>)<sub>2</sub>][LH<sub>3</sub>] (Coupled TwoTheta/Theta)

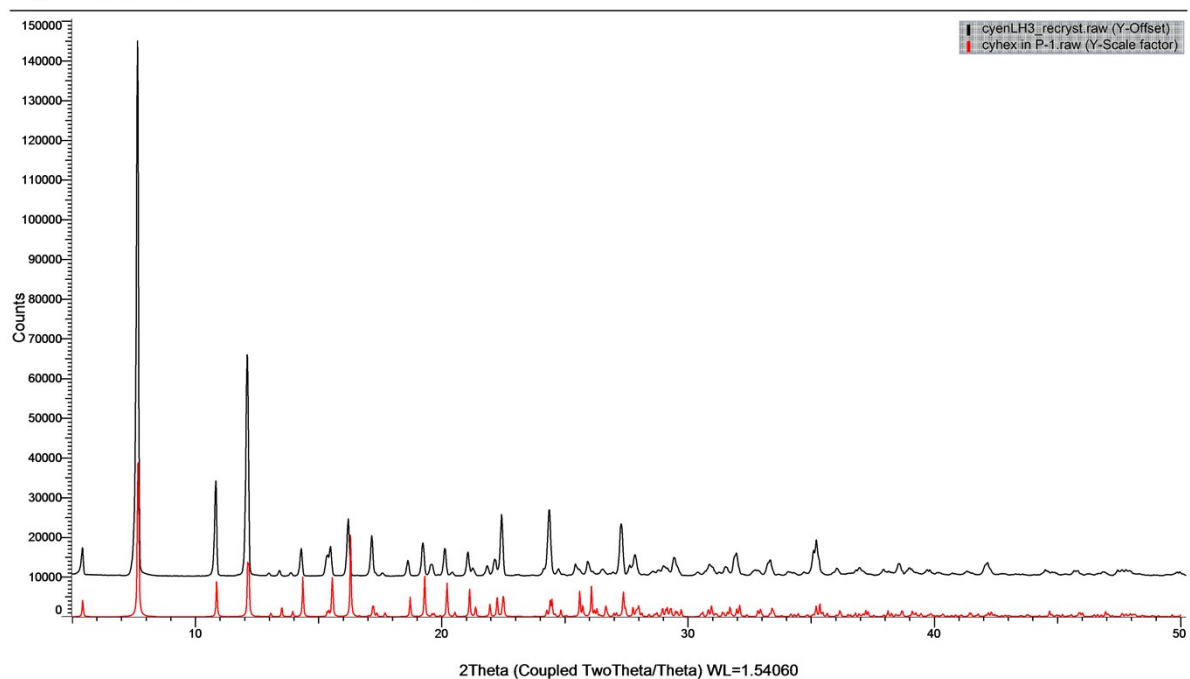

Figure S1.5. Experimental (black) and calculated (red) PXR D patterns for [cdaH<sub>2</sub>][LH<sub>3</sub>].3(H<sub>2</sub>O) **5**.

[xyl(NH3)2][LH3].4H2O\_recrist (Coupled TwoTheta/Theta)

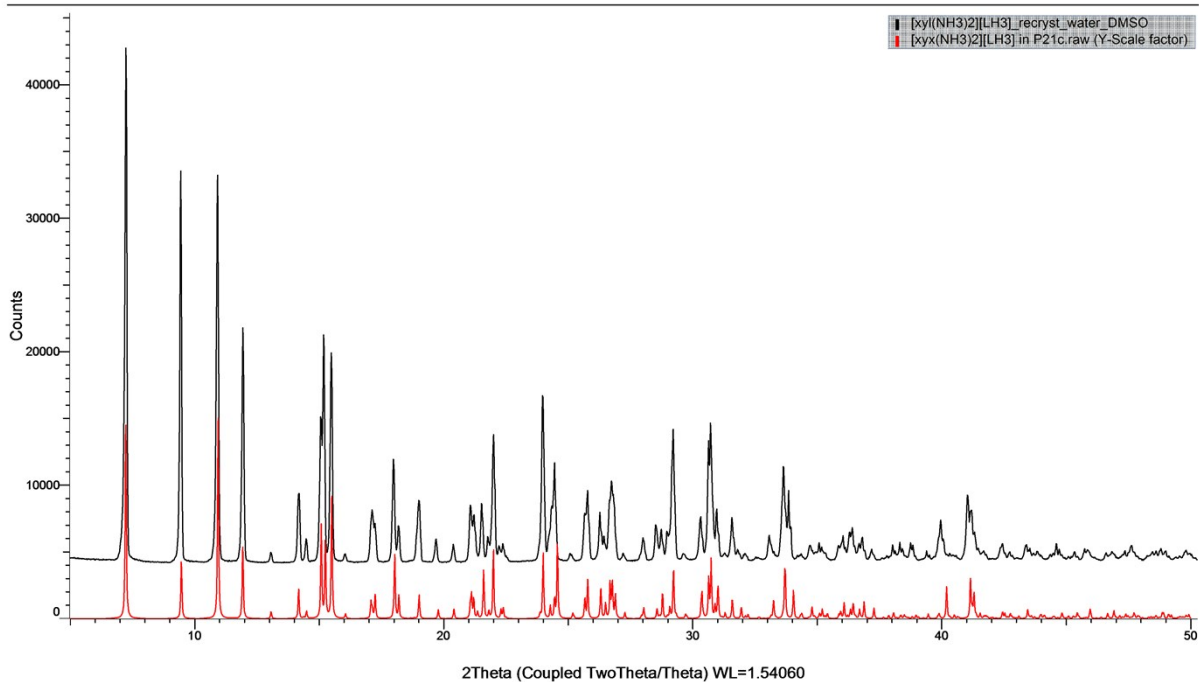

Figure S1.6. Experimental (black) and calculated (red) PXR D patterns for [xdaH<sub>2</sub>][LH<sub>3</sub>].4(H<sub>2</sub>O) **6**.

[onH2][LH3] (Coupled TwoTheta/Theta)

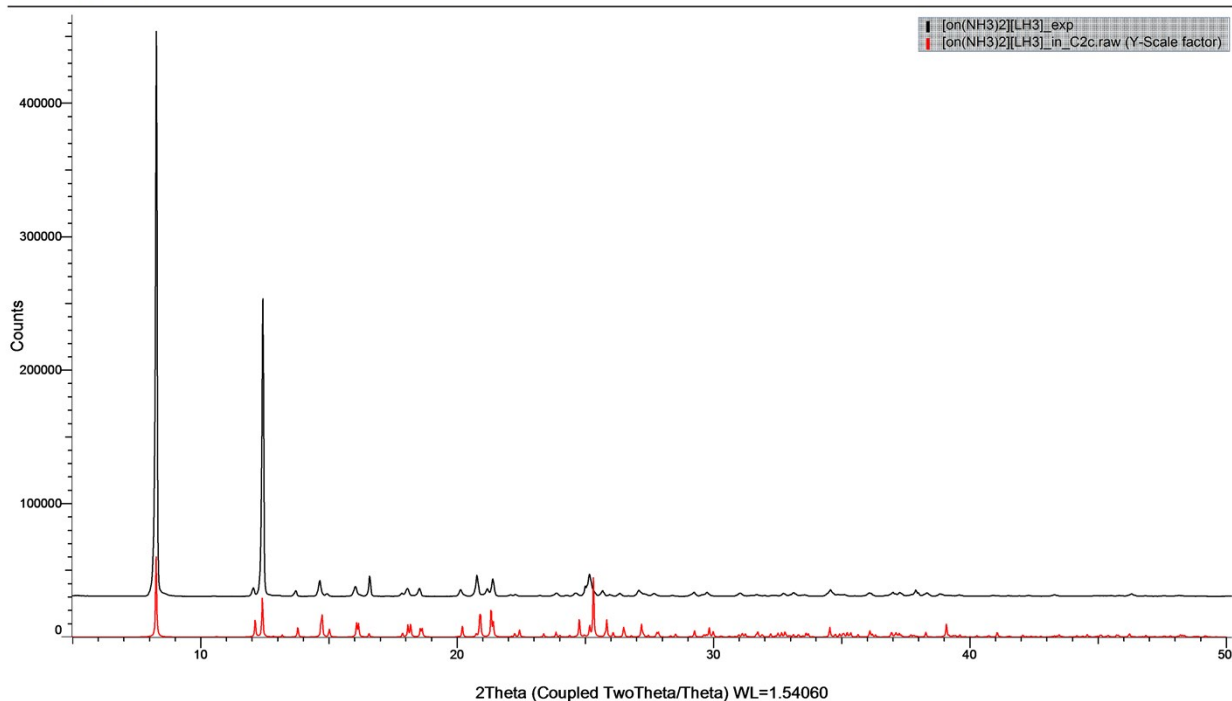

Figure S1.7. Experimental (black) and calculated (red) PXR D patterns for [odaH<sub>2</sub>][LH<sub>3</sub>].2(H<sub>2</sub>O).0.5EtOH **7**.

[PheNH<sub>3</sub>]<sub>2</sub>[LH<sub>3</sub>]<sub>2</sub>·CF\_01\_16 (Coupled TwoTheta/Theta)

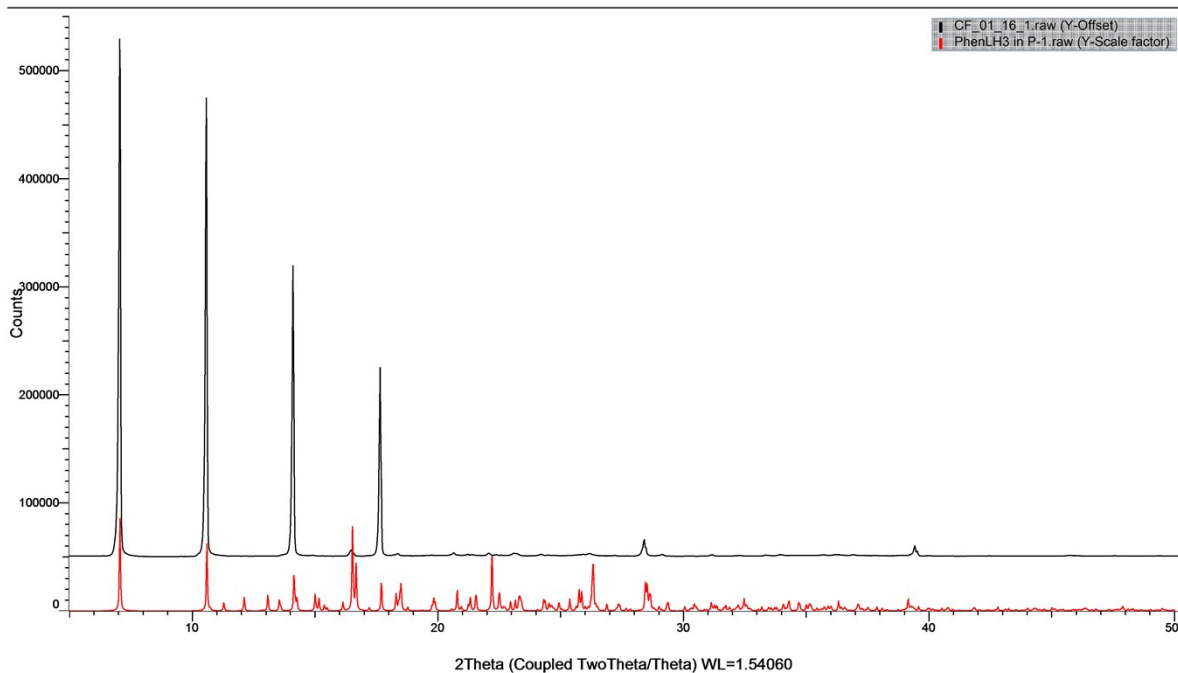

Figure S1.8. Experimental (black) and calculated (red) PXRD pattern for [PheH]<sub>2</sub>[LH<sub>3</sub>]<sub>2</sub>·2(H<sub>2</sub>O) **8**. The experimental PXRD appeared to exhibit severe preferred orientation effects, consistent with the plate-like habit and waxy nature of the crystals.

[mel][LH<sub>3</sub>]<sub>2</sub>·7H<sub>2</sub>O\_bulk (Coupled TwoTheta/Theta)

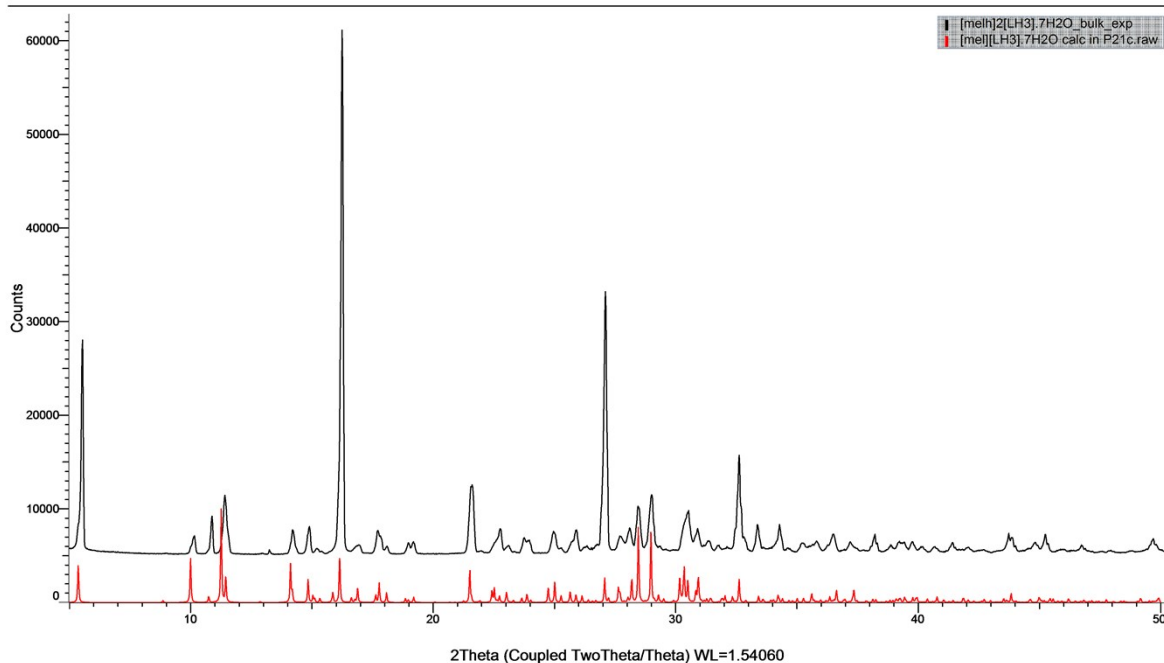

Figure S1.9. Experimental (black) PXRD and calculated (red) PXRD pattern for [melH]<sub>2</sub>[LH<sub>3</sub>]<sub>2</sub>·7(H<sub>2</sub>O) **9**.

## S2. Crystal Structure Diagrams.

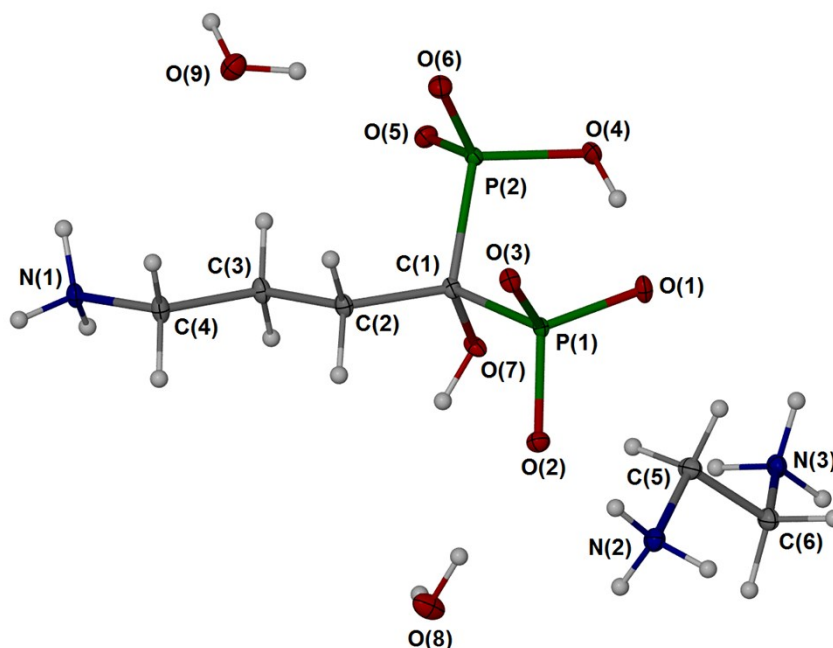

Figure S2.1 Diagram of  $[\text{enH}_2][\text{LH}_3] \cdot 2(\text{H}_2\text{O})$  **1** showing the asymmetric unit and atom labelling scheme. Non-hydrogen atoms are represented by 50% displacement ellipsoids and hydrogen atoms are as spheres of arbitrary size.

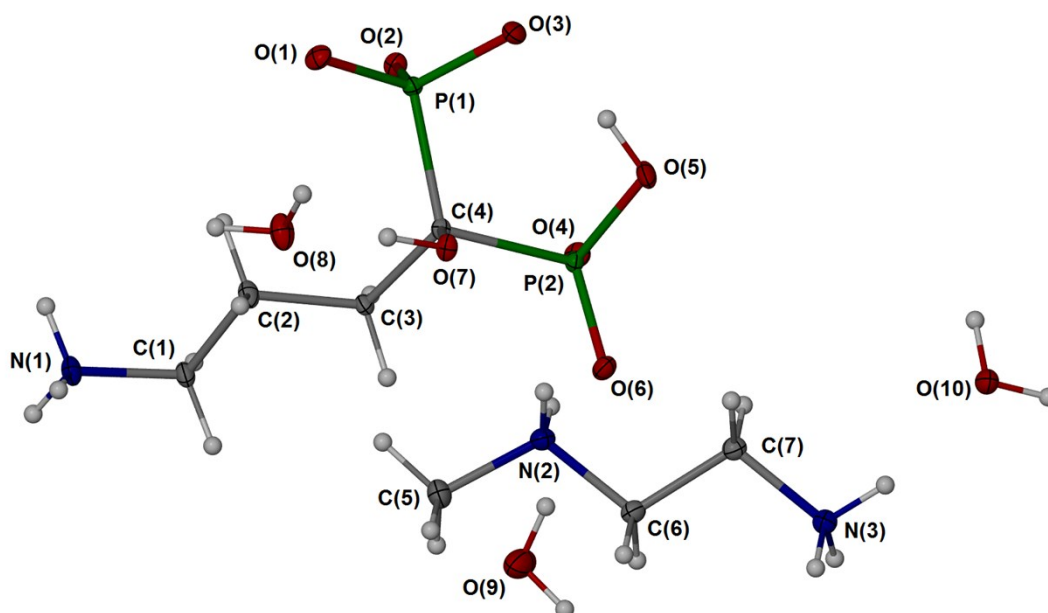

Figure S2.2 Diagram of  $[\text{MeenH}_2][\text{LH}_3] \cdot 3(\text{H}_2\text{O})$  **2** showing the asymmetric unit and atom labelling scheme. Non-hydrogen atoms are represented by 50% displacement ellipsoids and hydrogen atoms are as spheres of arbitrary size.

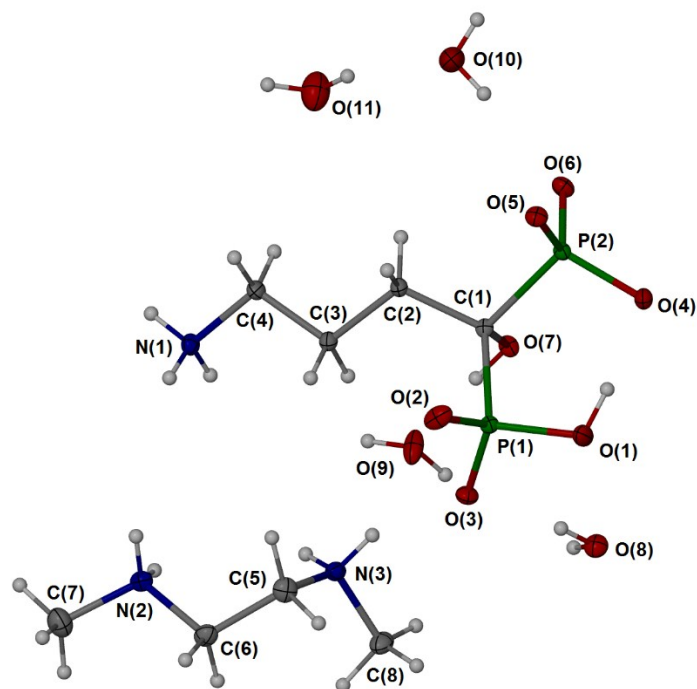

Figure S2.3 Diagram of  $[\text{Me}_2\text{enH}_2][\text{LH}_3]\cdot 3.5(\text{H}_2\text{O})$  **3** showing the asymmetric unit and atom labelling scheme. Non-hydrogen atoms are represented by 50% displacement ellipsoids and hydrogen atoms are as spheres of arbitrary size.

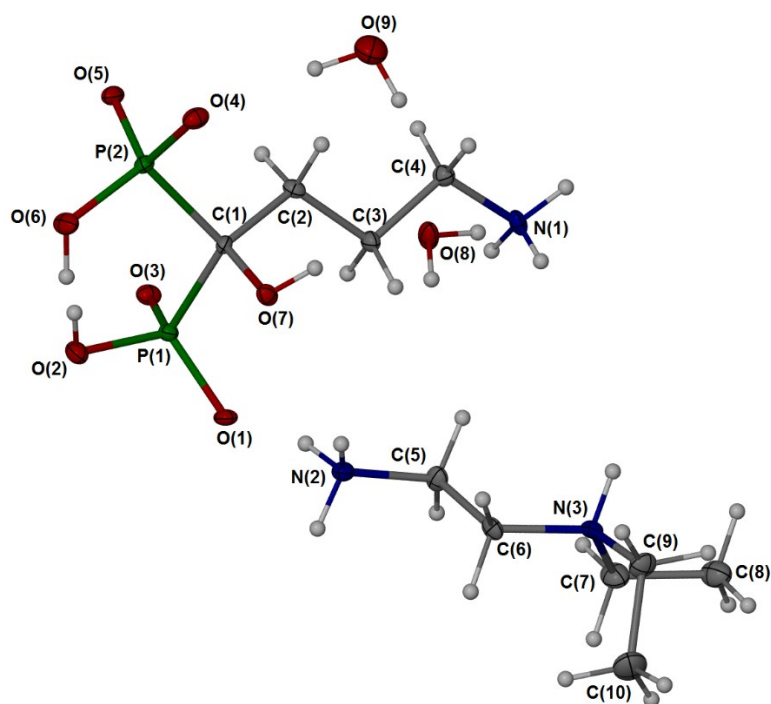

Figure S2.4 Diagram of  $[\text{Et}_2\text{enH}_2][\text{LH}_3]\cdot 2(\text{H}_2\text{O})$  **4** showing the asymmetric unit and atom labelling scheme. Non-hydrogen atoms are represented by 50% displacement ellipsoids and hydrogen atoms are as spheres of arbitrary size. The hydrogen atoms attached to O(2) and O(6) represent two components of a single disordered hydrogen position.

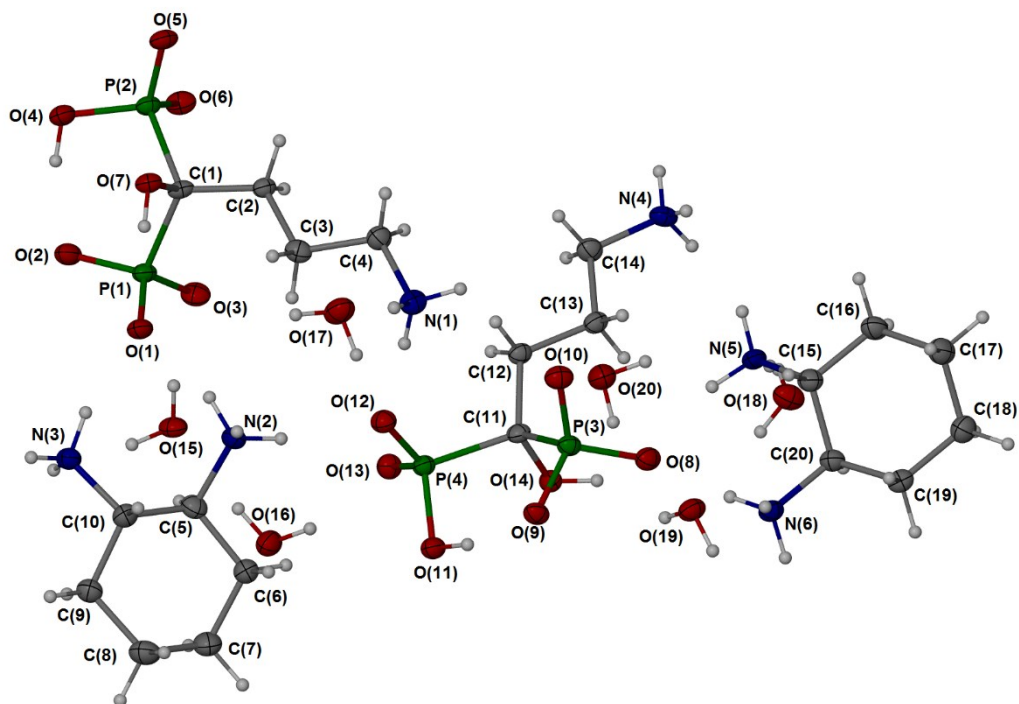

Figure S2.5 Diagram of  $[cdaH_2][LH_3] \cdot 3(H_2O)$  **5** showing the asymmetric unit and atom labelling scheme. Non-hydrogen atoms are represented by 50% displacement ellipsoids and hydrogen atoms are as spheres of arbitrary size.

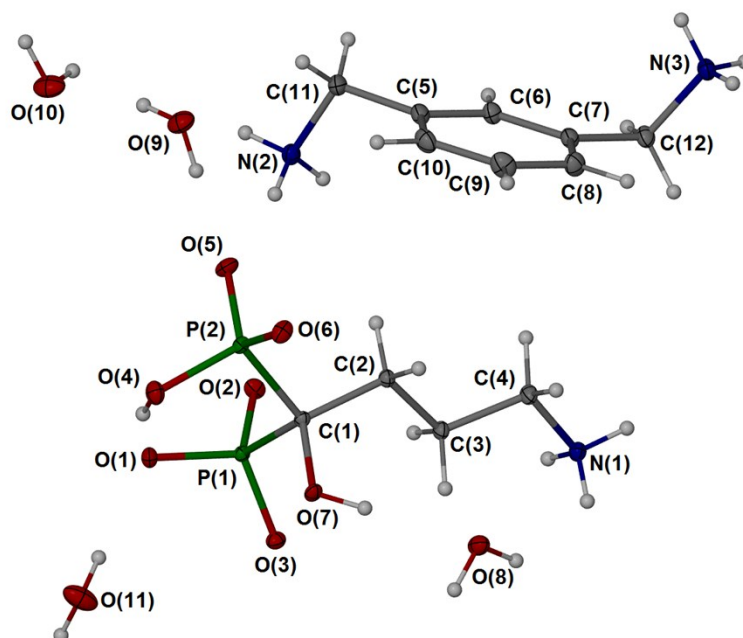

Figure S2.6 Diagram of  $[xdaH_2][LH_3] \cdot 4(H_2O)$  **6** showing the asymmetric unit and atom labelling scheme. Non-hydrogen atoms are represented by 50% displacement ellipsoids and hydrogen atoms are as spheres of arbitrary size.



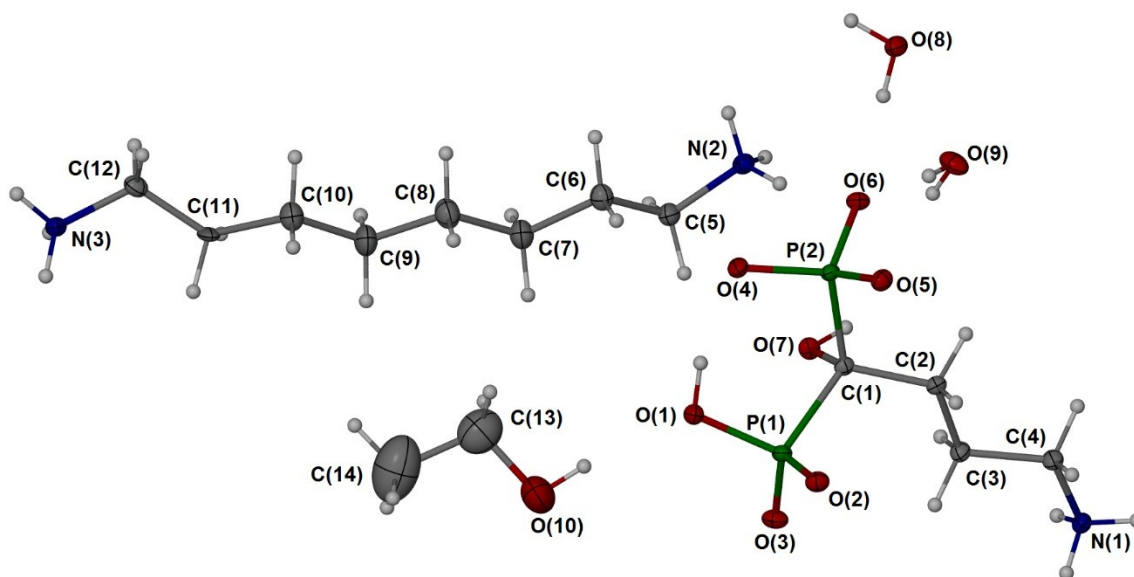

Figure S2.7 Diagram of  $[\text{odaH}_2][\text{LH}_3] \cdot 2(\text{H}_2\text{O}) \cdot 0.5\text{EtOH}$  **7** showing the asymmetric unit and atom labelling scheme. Non-hydrogen atoms are represented by 50% displacement ellipsoids and hydrogen atoms are as spheres of arbitrary size. The carbon atoms of the octyl chain C(5)-C(11) were modelled as disordered over two positions, only one component is shown.

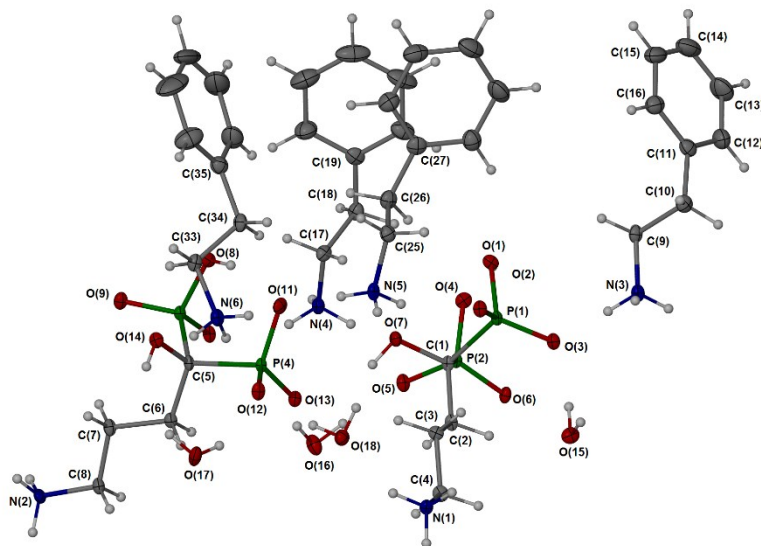

Figure S2.8 Diagram of  $[\text{PheaH}]_2[\text{LH}_3] \cdot 2(\text{H}_2\text{O})$  **8** showing the asymmetric unit and atom labelling scheme. Non-hydrogen atoms are represented by 50% displacement ellipsoids and hydrogen atoms are as spheres of arbitrary size. Unlabelled Ph rings are numbered sequentially and anti-clockwise from the *ipso* carbon atom.

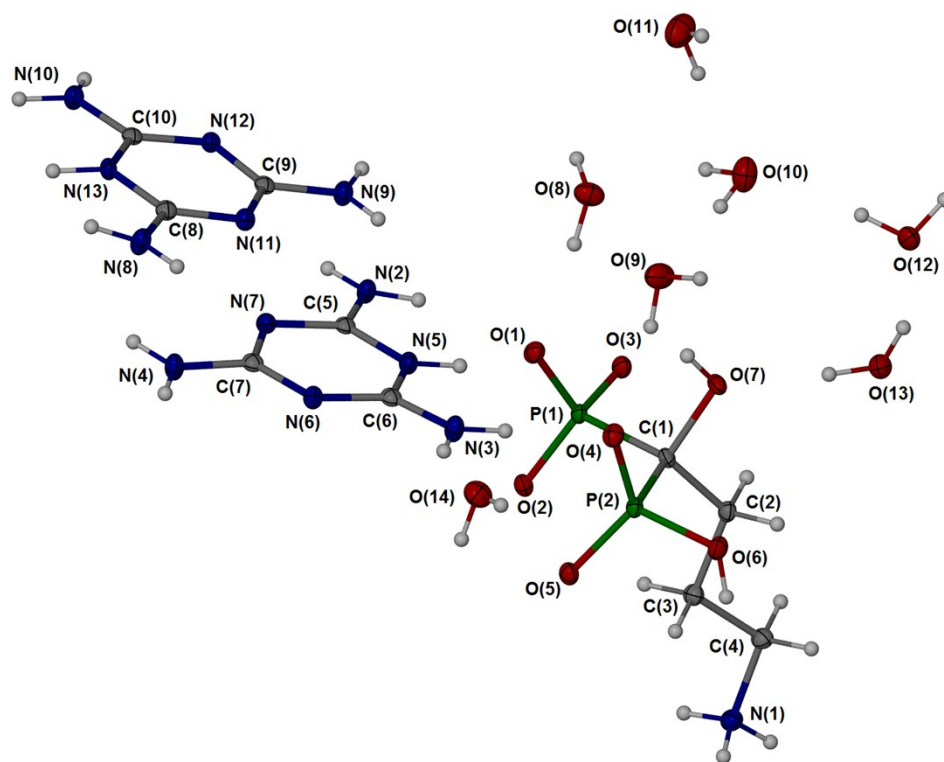

Figure S2.9 Diagram of  $[\text{melH}]_2[\text{LH}_3] \cdot 7(\text{H}_2\text{O})$  **9** showing the asymmetric unit and atom labelling scheme. Non-hydrogen atoms are represented by 50% displacement ellipsoids and hydrogen atoms are as spheres of arbitrary size.
